# Supplementary material
Source: MDPI journal article supplement (https://www.mdpi.com/1424-8247/17/1/3)
Supplement: s1 [file s1]

**Table S1. Spearman's Correlations (rho and p-value) between liver parameters at admission (1), 7 days (2) and discharge (3)**

|             |         | AST1    | ALT1    | GGT1    | AST2    | ALT2    | GGT2    | AST3    | ALT3    | GGT3    |
|-------------|---------|---------|---------|---------|---------|---------|---------|---------|---------|---------|
| <b>AST1</b> | Rho     | 1.000   | 0.627** | 0.155   | 0.492** | 0.365** | 0.178   | 0.393** | 0.165** | 0.251   |
|             | p-value | .       | 0.000   | 0.053   | 0.000   | 0.000   | 0.192   | 0.000   | 0.006   | 0.073   |
| <b>ALT1</b> | Rho     | 0.627** | 1.000   | 0.338** | 0.462** | 0.470** | 0.470** | 0.403** | 0.320** | .360**  |
|             | p-value | 0.000   | .       | 0.000   | 0.000   | 0.000   | 0.000   | 0.000   | 0.000   | 0.009   |
| <b>GGT1</b> | Rho     | 0.155   | 0.338** | 1.000   | 0.236*  | 0.271** | 0.860** | 0.322** | 0.237** | 0.817** |
|             | p-value | 0.053   | 0.000   | .       | 0.018   | 0.006   | 0.000   | 0.000   | 0.008   | 0.000   |
| <b>AST2</b> | Rho     | 0.492** | 0.462** | 0.236*  | 1.000   | 0.638** | 0.410** | 0.598** | 0.259** | 0.067   |
|             | p-value | 0.000   | 0.000   | 0.018   | .       | 0.000   | 0.003   | 0.000   | 0.001   | 0.722   |
| <b>ALT2</b> | Rho     | 0.365** | 0.470** | 0.271** | 0.638** | 1.000   | 0.306*  | 0.321** | 0.573** | 0.088   |
|             | p-value | 0.000   | 0.000   | 0.006   | 0.000   | .       | 0.029   | 0.000   | 0.000   | 0.638   |
| <b>GGT2</b> | Rho     | 0.178   | 0.470** | 0.860** | 0.410** | 0.306*  | 1.000   | 0.361*  | 0.122   | 0.840** |
|             | p-value | 0.192   | 0.000   | 0.000   | 0.003   | 0.029   | .       | 0.016   | 0.430   | 0.000   |
| <b>AST3</b> | Rho     | 0.393** | 0.403** | 0.322** | 0.598** | 0.321** | 0.361*  | 1.000   | 0.548** | 0.463** |
|             | p-value | 0.000   | 0.000   | 0.000   | 0.000   | 0.000   | 0.016   | .       | 0.000   | 0.001   |
| <b>ALT3</b> | Rho     | 0.165** | 0.320** | 0.237** | 0.259** | 0.573** | 0.122   | 0.548** | 1.000   | 0.419** |
|             | p-value | 0.006   | 0.000   | 0.008   | 0.001   | 0.000   | 0.430   | 0.000   | .       | 0.002   |
| <b>GGT3</b> | Rho     | 0.251   | 0.360** | 0.817** | 0.067   | 0.088   | 0.840** | 0.463** | 0.419** | 1.000   |
|             | p-value | 0.073   | 0.009   | 0.000   | 0.722   | 0.638   | 0.000   | 0.001   | 0.002   | .       |

\*\* . Correlation is significant at the 0.01 level (2-tailed) and \* at the 0.05 level (2-tailed).

ALT, alanine aminotransferase; AST, aspartate aminotransferase; GGT, gamma glutamyl transferase.
